# Supplementary material
Source: PubMed Central journal article supplement (PMC4312239)
Supplement: NIHMS632837-supplement.pdf [file NIHMS632837-supplement.pdf]

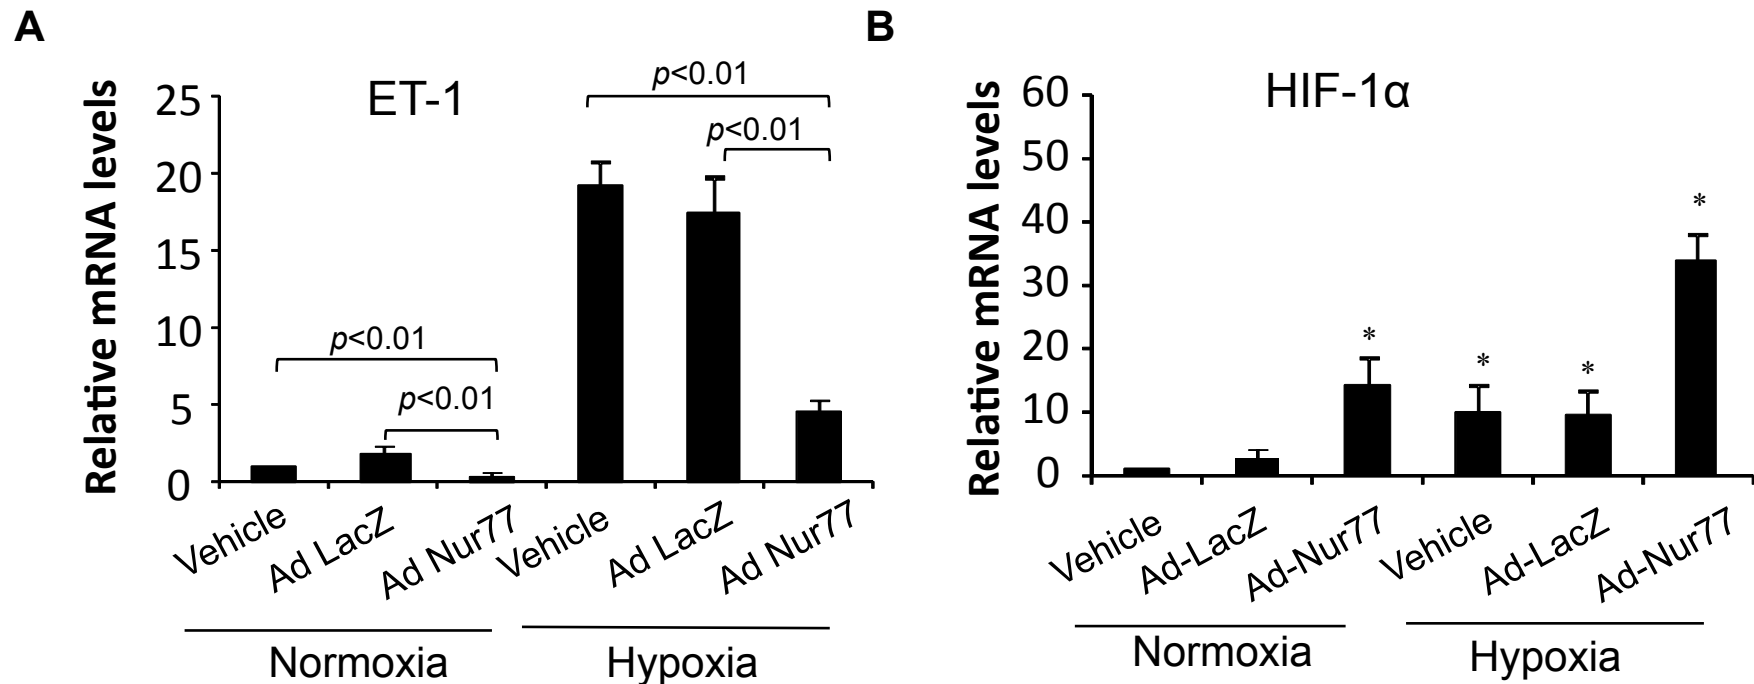

**Supplemental Figure 1. Nur77 inhibits hypoxia induced ET-1 expression.** HUVECs were infected with Ad-LacZ and Ad-Nur77 virus (MOI=100) for 24 hours, cell lines were cultured under hypoxia or normoxia (1% O<sub>2</sub>) conditions for 24 hours. The expression of ET-1 (A) and HIF-1 $\alpha$  mRNA (B) was detected by qRT-PCR. \*  $P < 0.05$  compared with vehicle under normoxia condition.
